# Supplementary material for: Bimetallic cyclometalated iridium complexes bridged by a BODIPY linker
Source: Royal Society of Chemistry journal article supplement (doi:10.1039/d0dt02690e), 2020-01-01
Supplement: d0dt02690e1.pdf [file d0dt02690e1.pdf]

# Electronic Supplementary Information for

## **Bimetallic Cyclometalated Iridium Complexes Bridged by a BODIPY Linker**

Gregory D. Sutton, Ku Sun Choung, Karen Marroquin, and Thomas S. Teets\*

*Department of Chemistry, University of Houston,  
3585 Cullen Blvd. Room 112, Houston, TX 77204-5003, USA  
email: tteets@uh.edu*

| <i>Index</i>                                                                   | <i>Page</i> |
|--------------------------------------------------------------------------------|-------------|
| NMR spectra of all new complexes                                               | S2–S14      |
| High resolution mass spectrometric analysis of complexes <b>3–5</b>            | S15–S17     |
| Additional PL spectra and data summaries                                       | S18–S21     |
| Excitation spectra of <b>3–5</b> overlaid with absorption spectrum of <b>2</b> | S22–S23     |

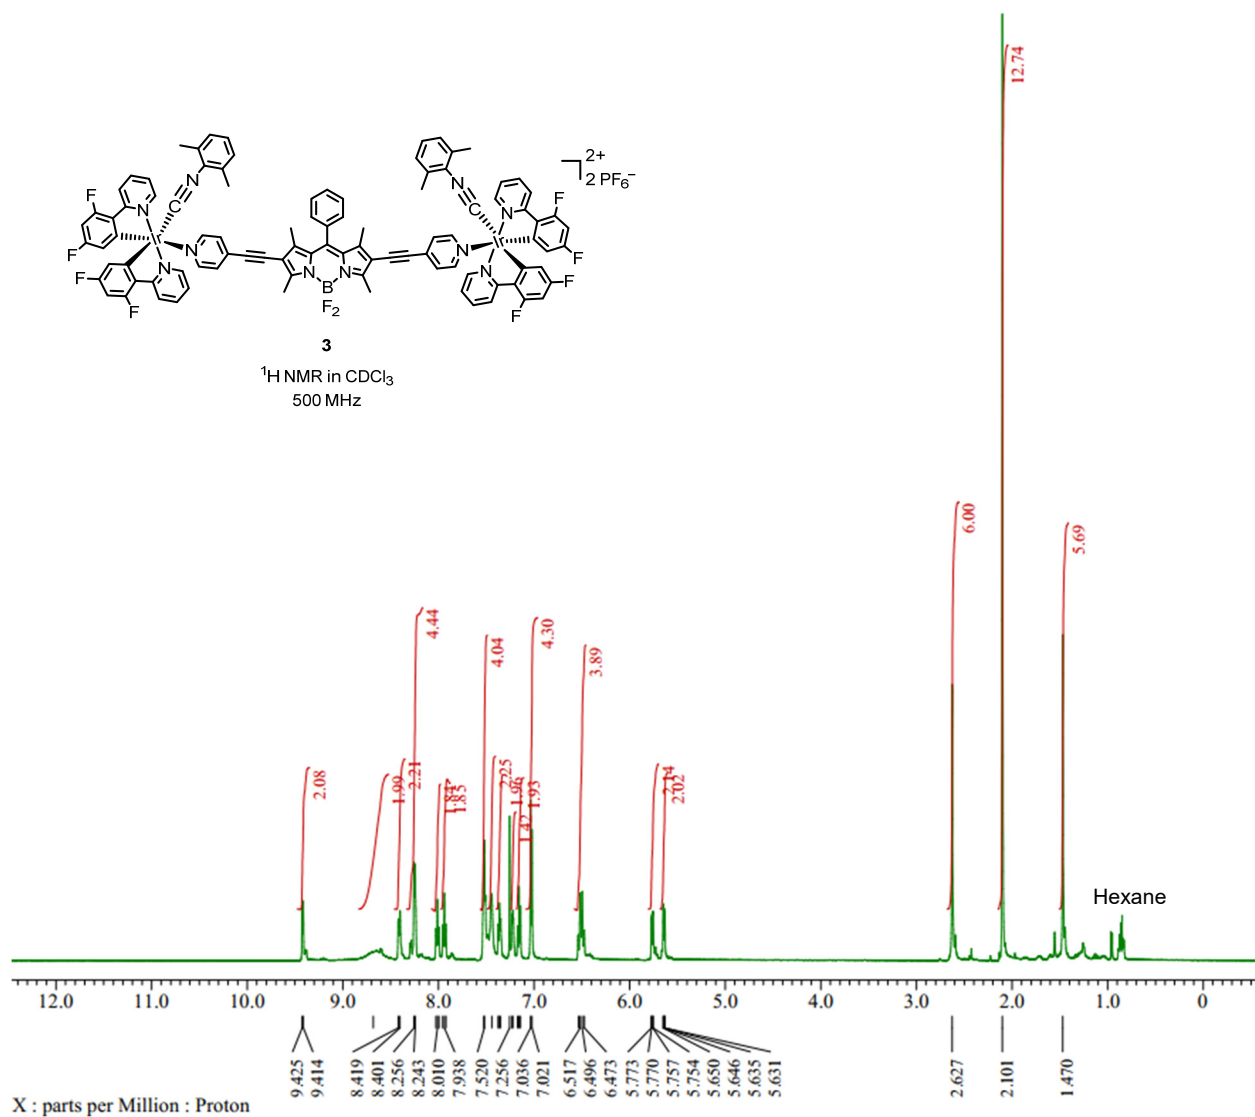

**Fig. S1a.**  $^1\text{H}$  NMR spectrum of complex **3**, recorded at 500 MHz in  $\text{CDCl}_3$ .

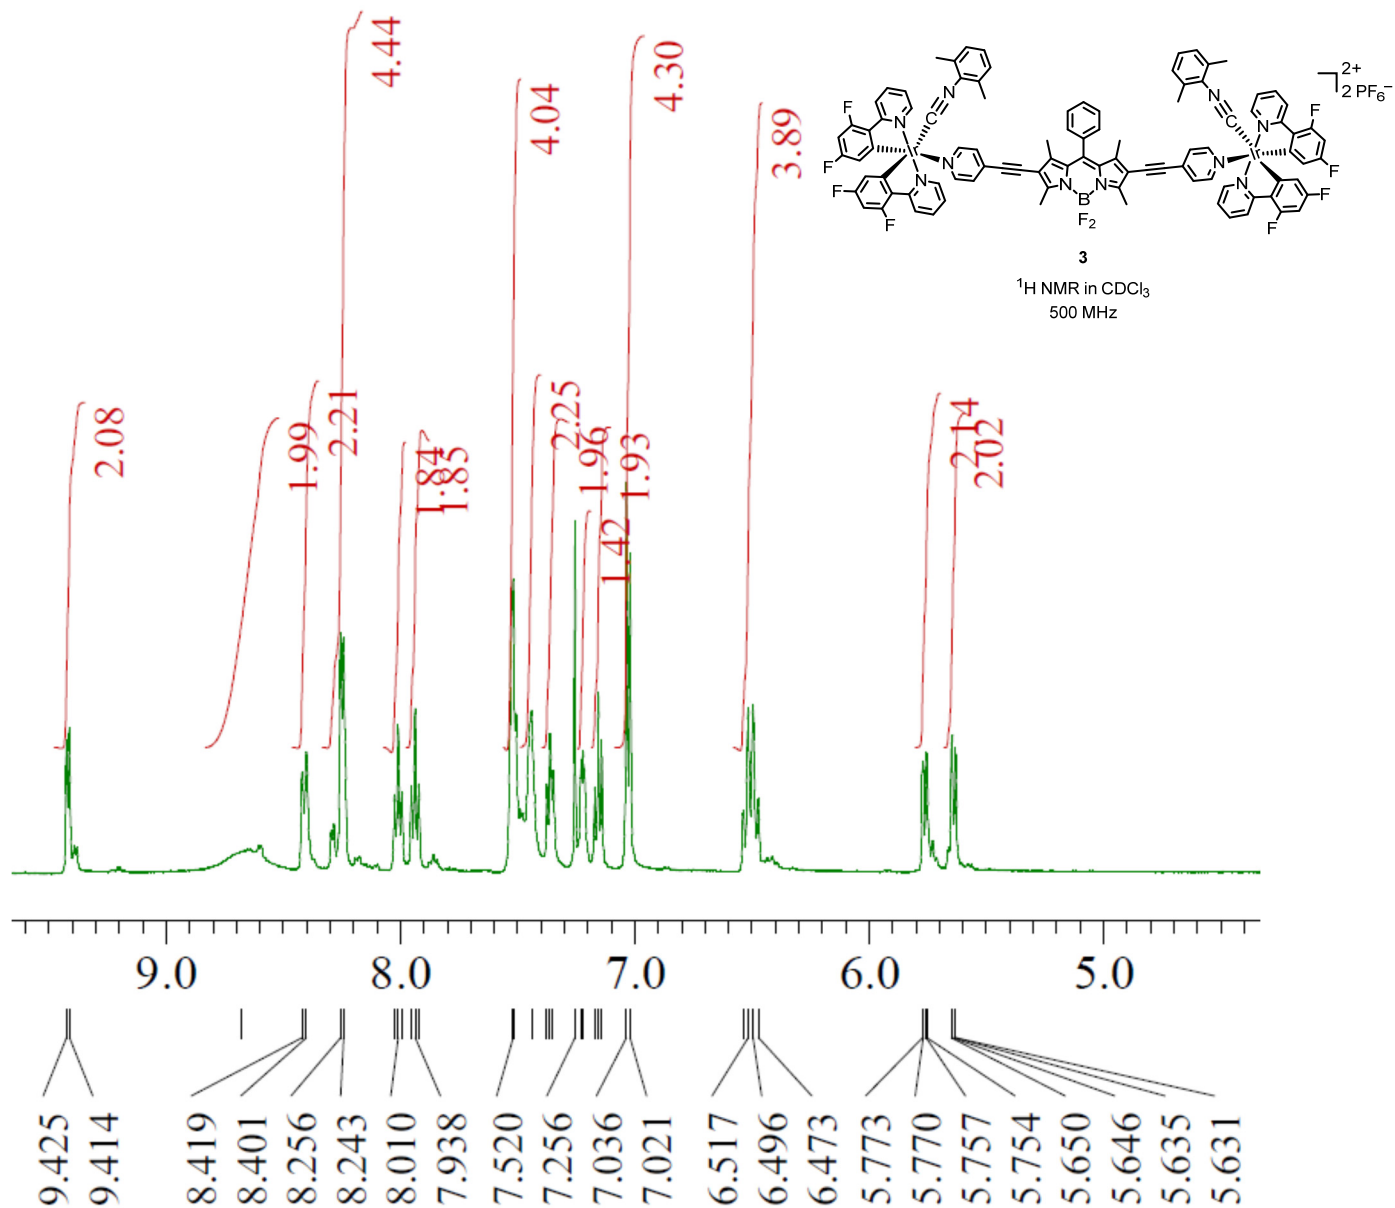

**Fig. S1b.** Expansion of  $^1H$  NMR spectrum in the aromatic region of complex **3**, recorded at 500 MHz in  $CDCl_3$ .

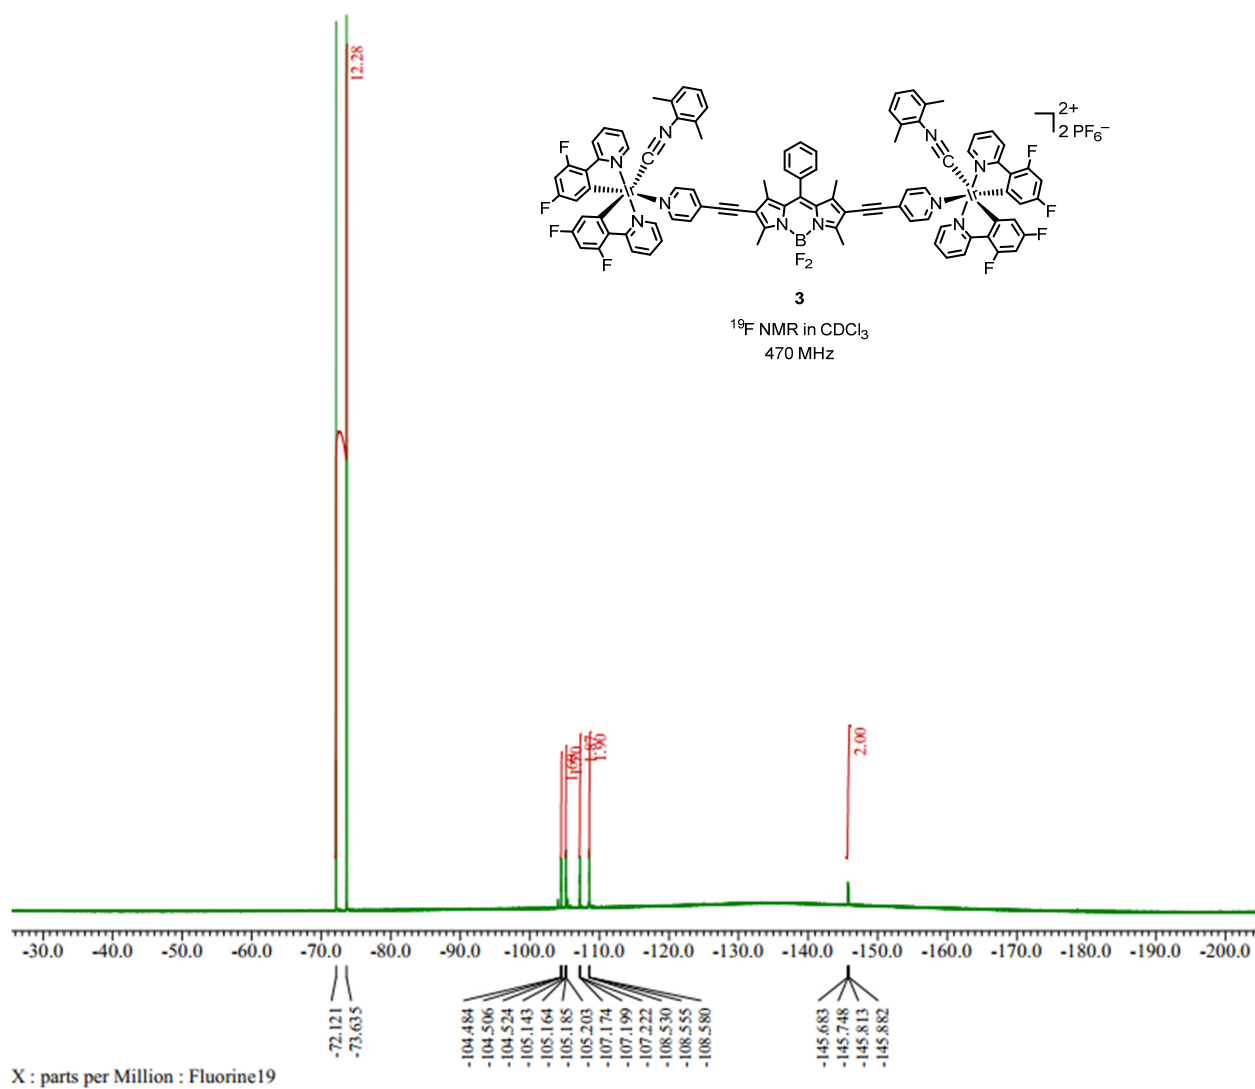

**Fig. S2a.** <sup>19</sup>F NMR spectrum of complex **3**, recorded at 470 MHz in CDCl<sub>3</sub>.

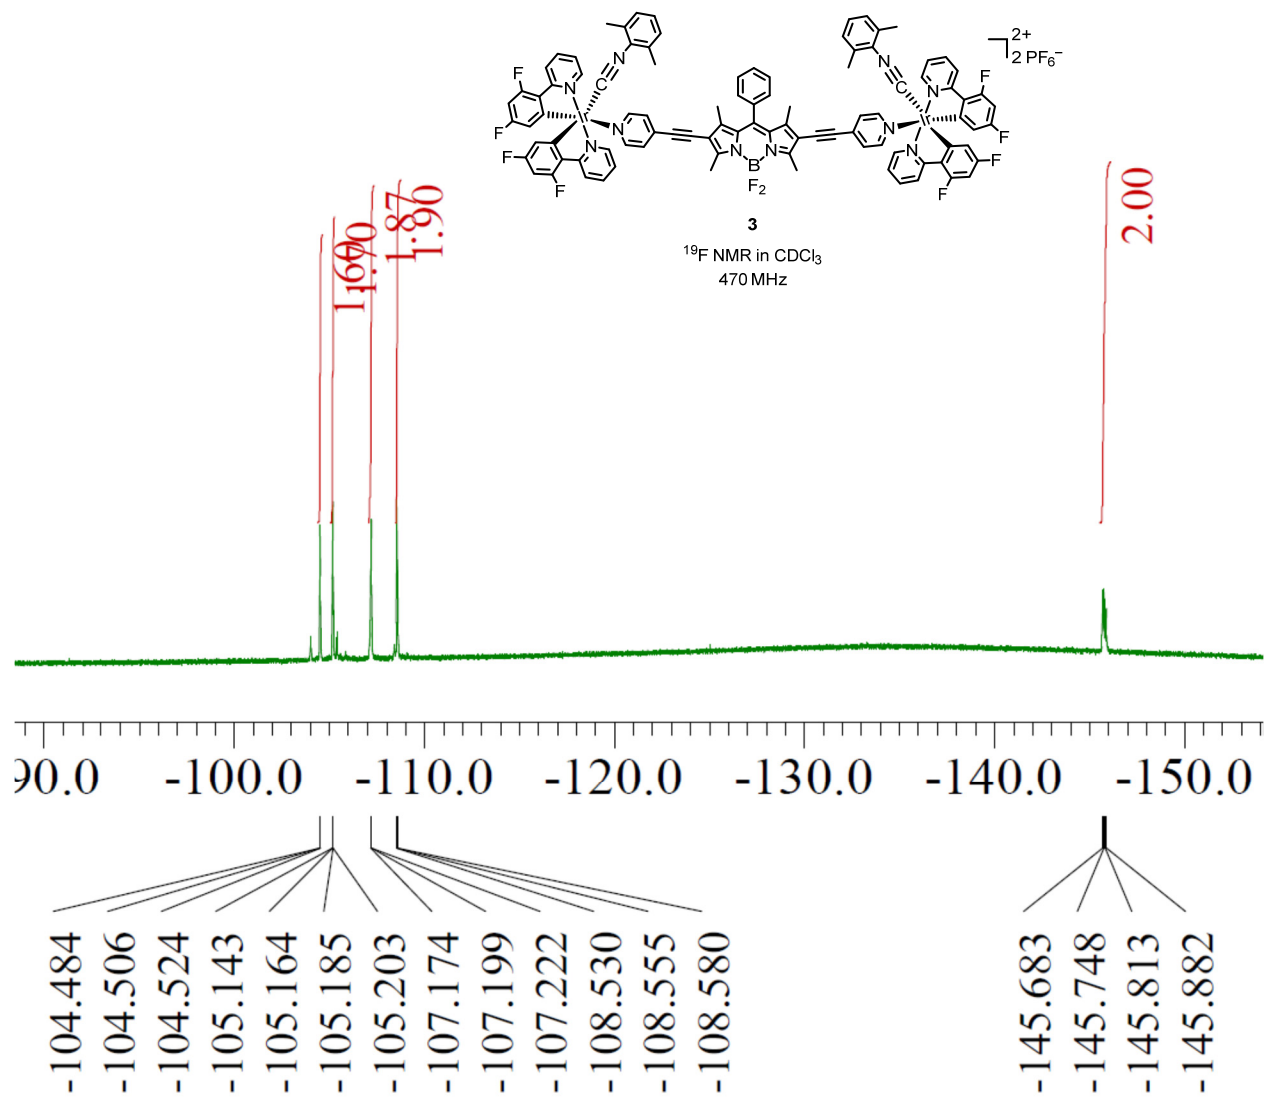

**Fig. S2b.** Expansion of  $^{19}\text{F}$  NMR spectrum of complex **3**, recorded at 470 MHz in  $\text{CDCl}_3$ .

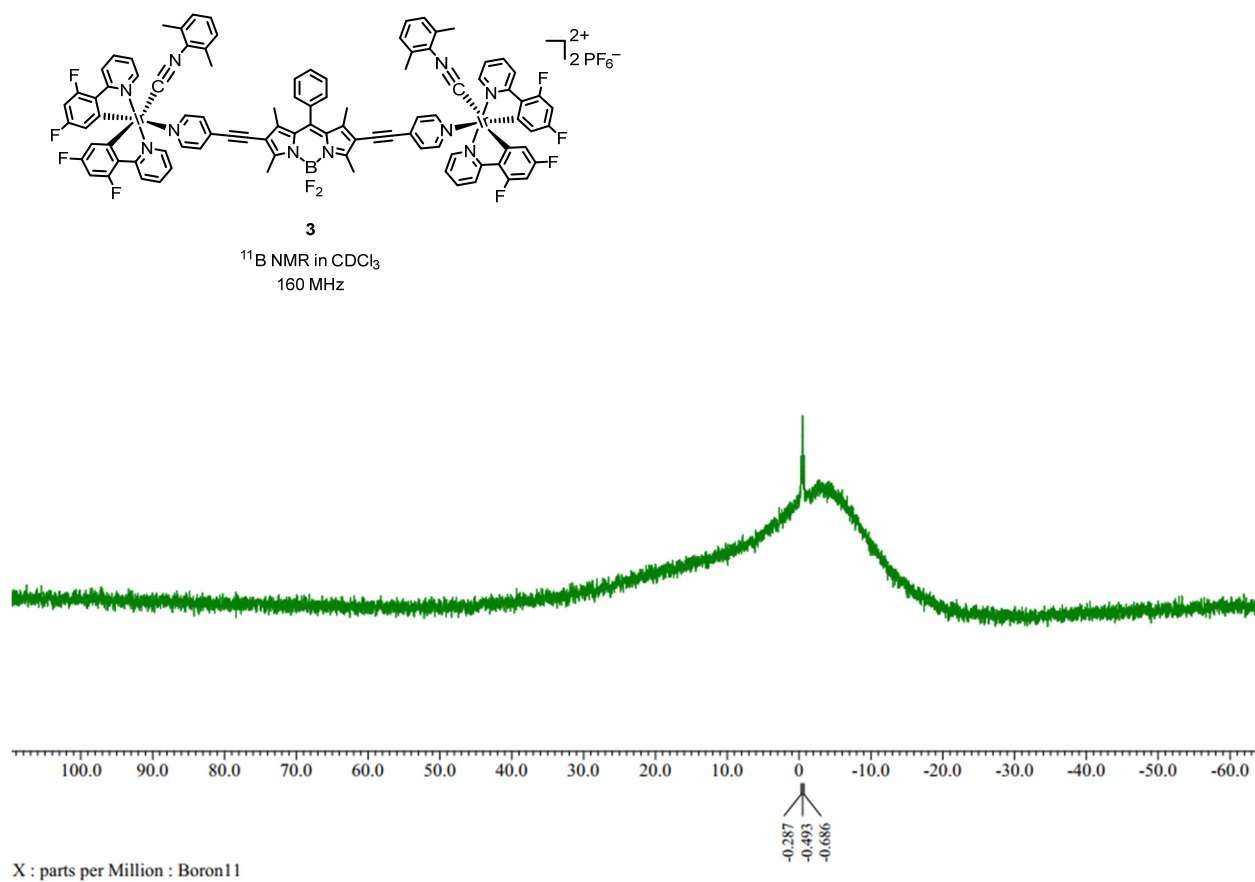

**Fig. S3.**  $^{11}\text{B}$  NMR spectrum of complex **3**, recorded at 160 MHz in  $\text{CDCl}_3$ .

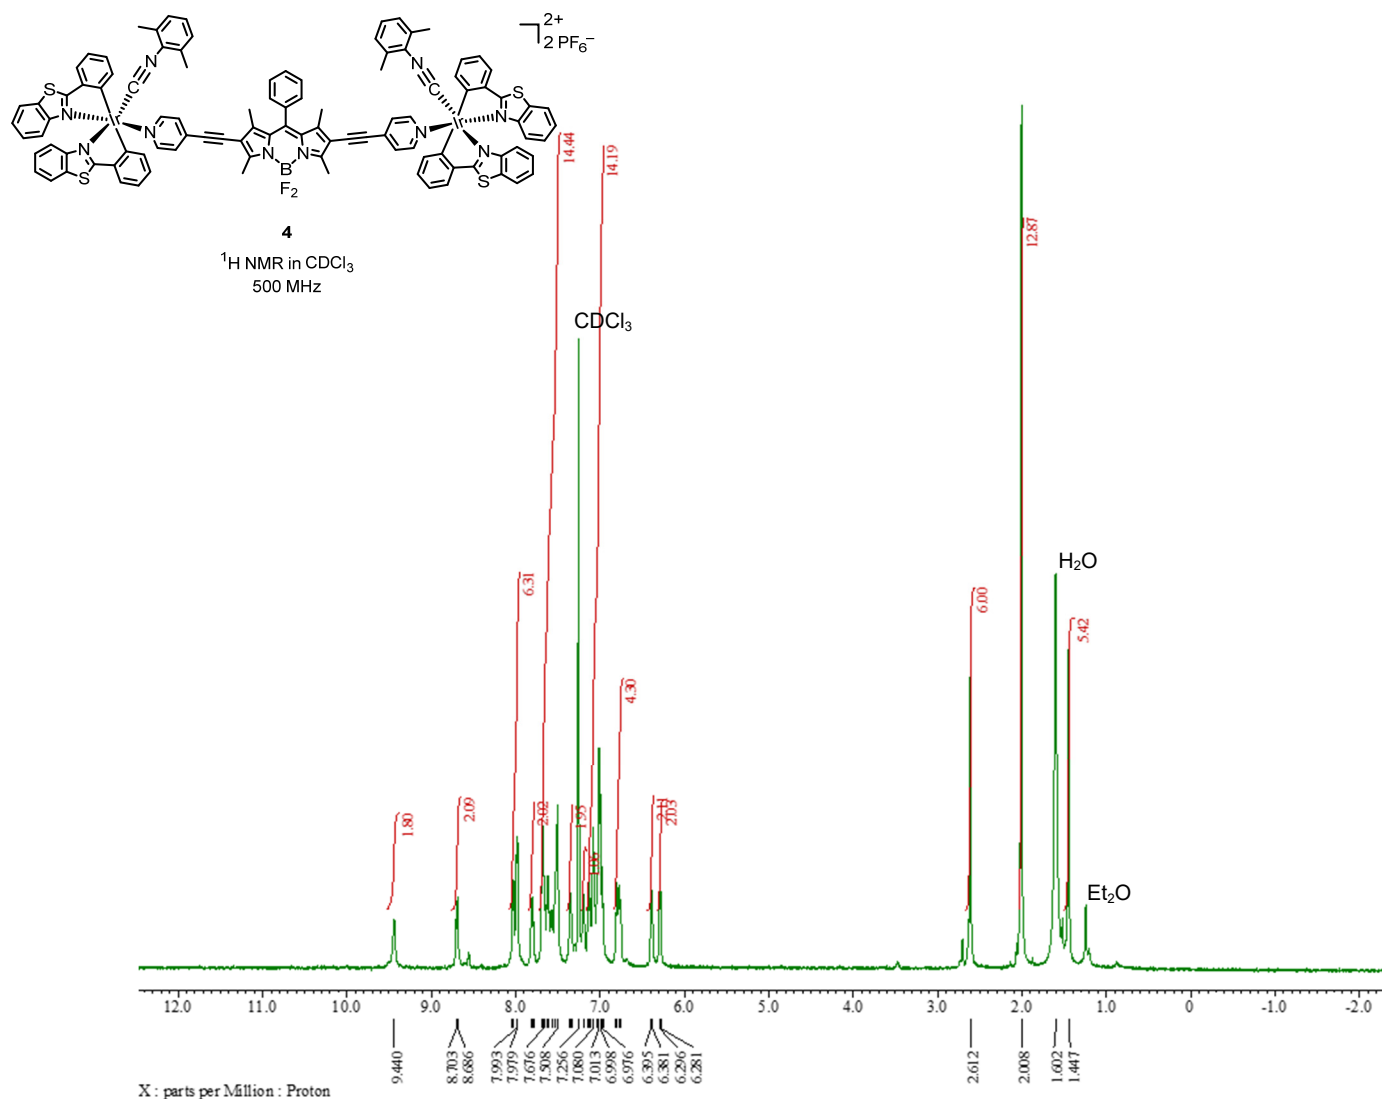

**Fig. S4a.**  $^1\text{H}$  NMR spectrum of complex **4**, recorded at 500 MHz in  $\text{CDCl}_3$ .

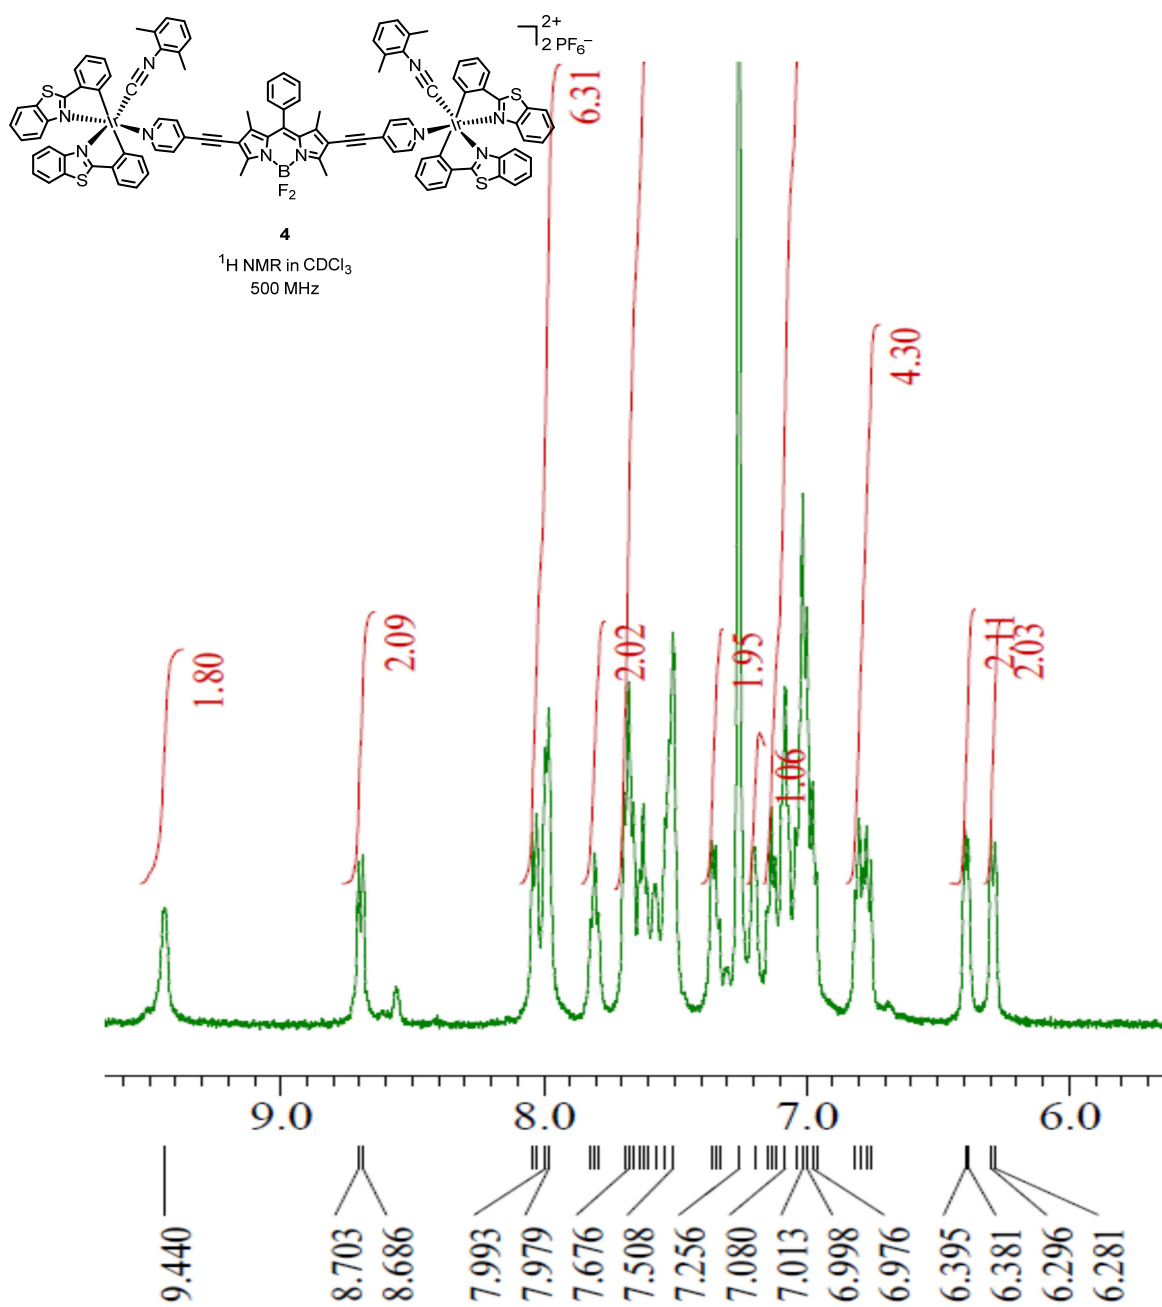

**Fig. S4b.** Expansion of  $^1\text{H}$  NMR spectrum in the aromatic region of complex **4**, recorded at 500 MHz in  $\text{CDCl}_3$ .

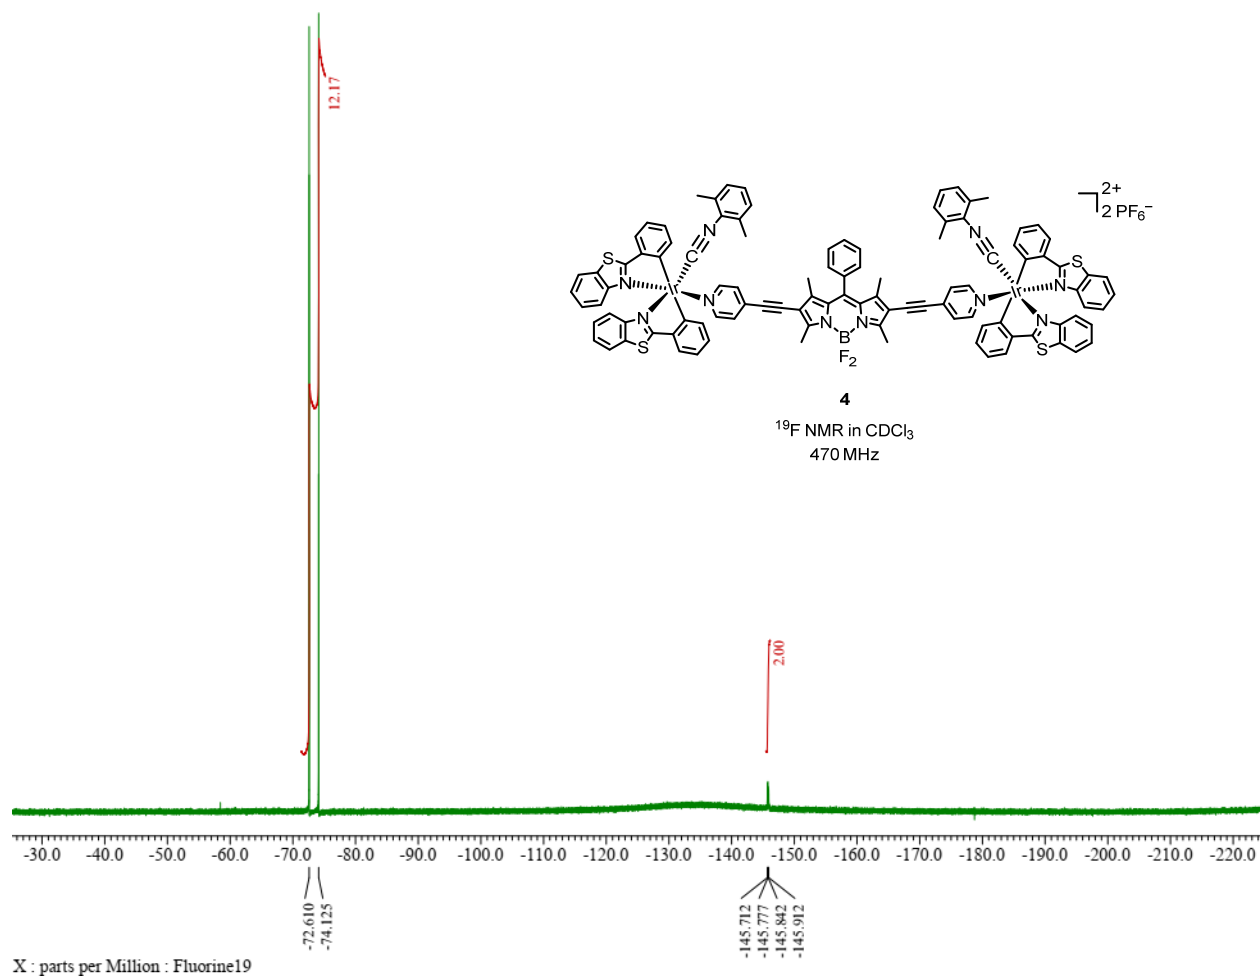

**Fig. S5.**  $^{19}\text{F}$  NMR spectrum of complex **4**, recorded at 470 MHz in  $\text{CDCl}_3$ .

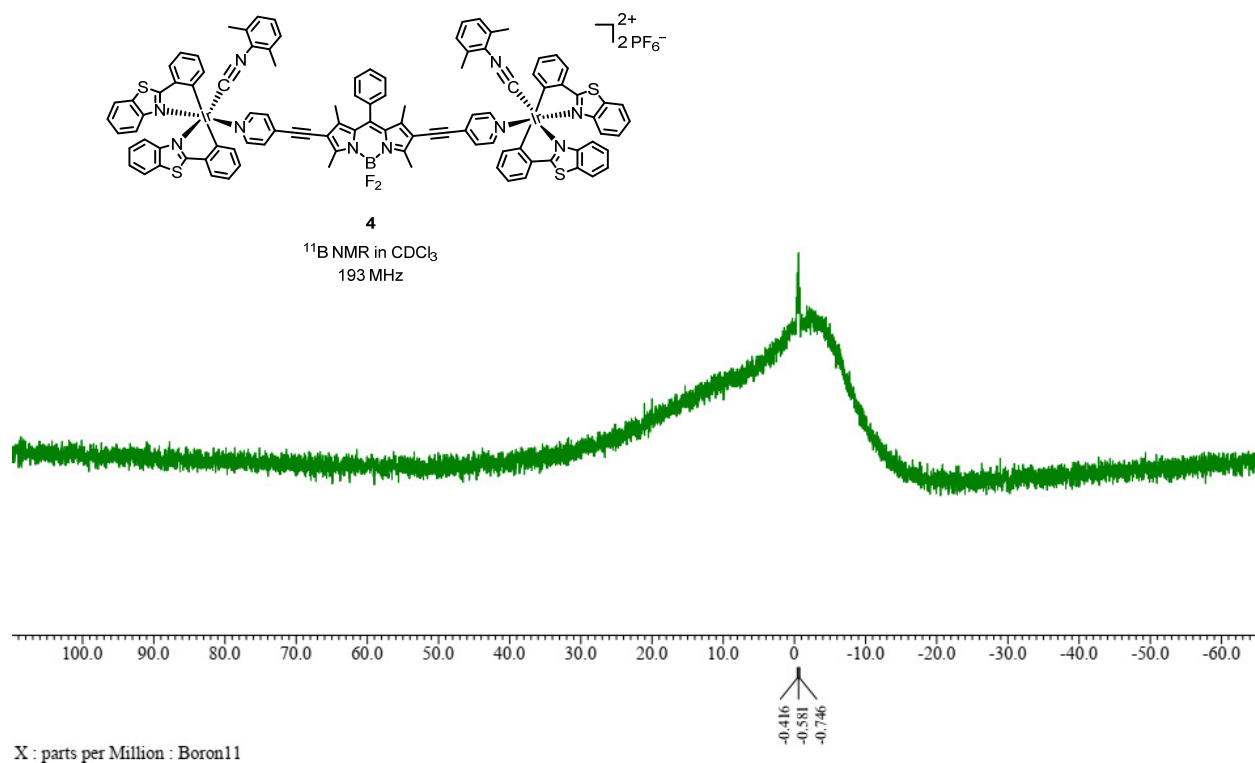

**Fig. S6.** <sup>11</sup>B NMR spectrum of complex **4**, recorded at 193 MHz in CDCl<sub>3</sub>.

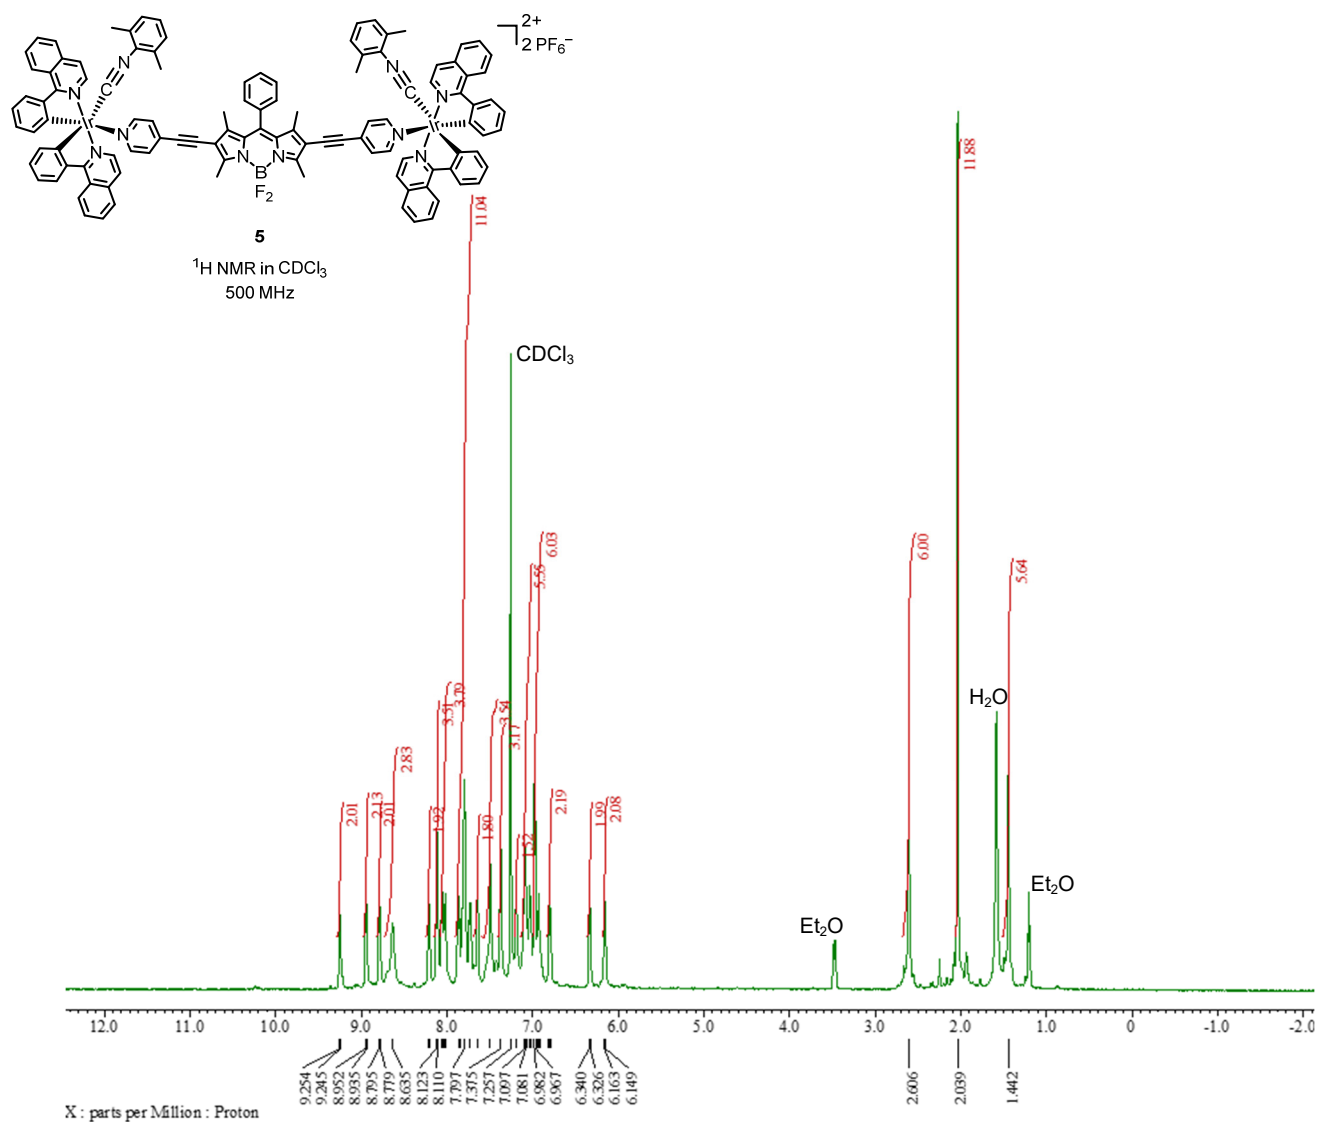

**Fig. S7a.**  $^1\text{H}$  NMR spectrum of complex **5**, recorded at 500 MHz in  $\text{CDCl}_3$ .

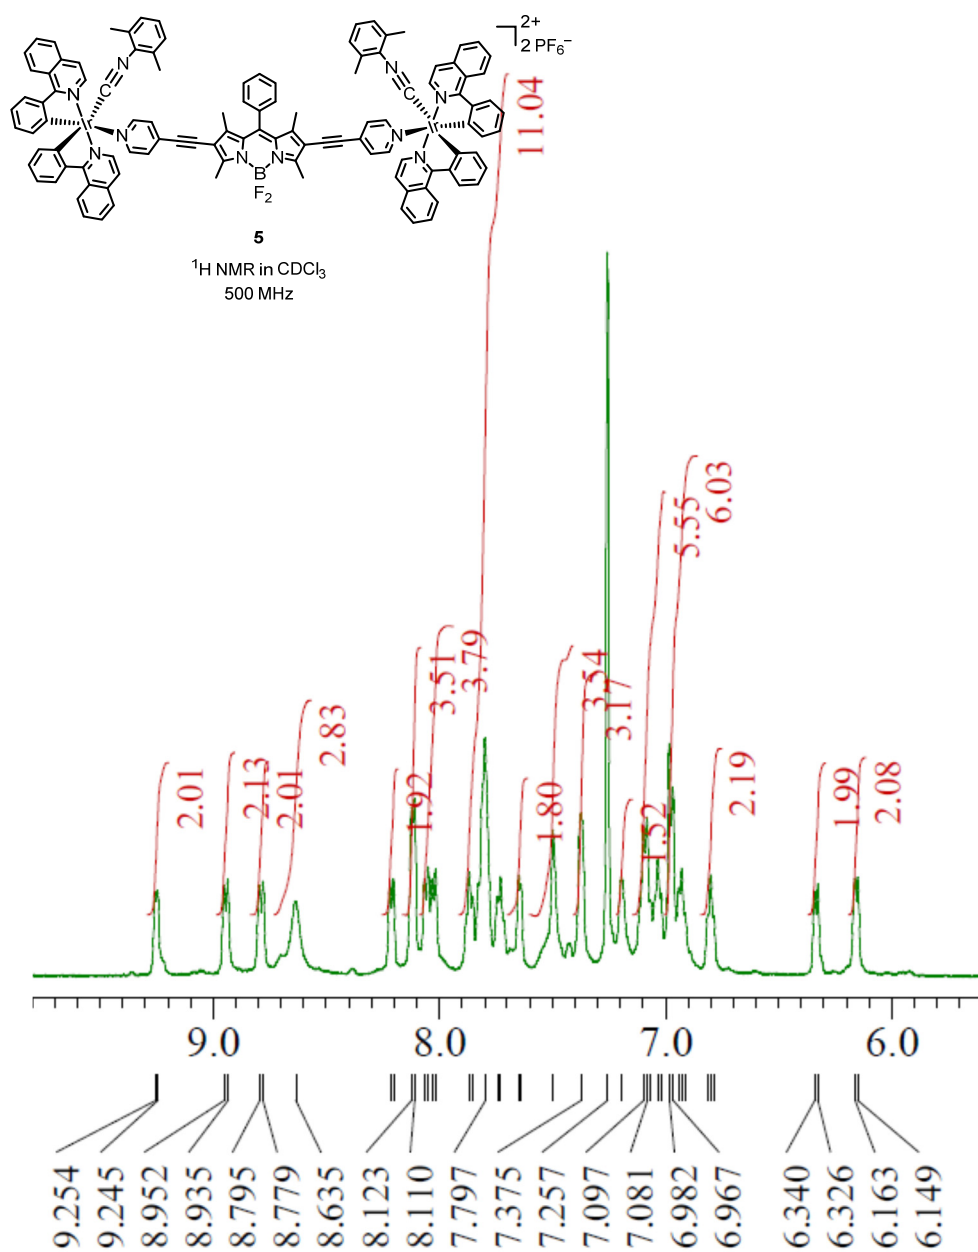

**Fig. S7b.** Expansion of  $^1\text{H}$  NMR spectrum in the aromatic region of complex **5**, recorded at 500 MHz in  $\text{CDCl}_3$ .

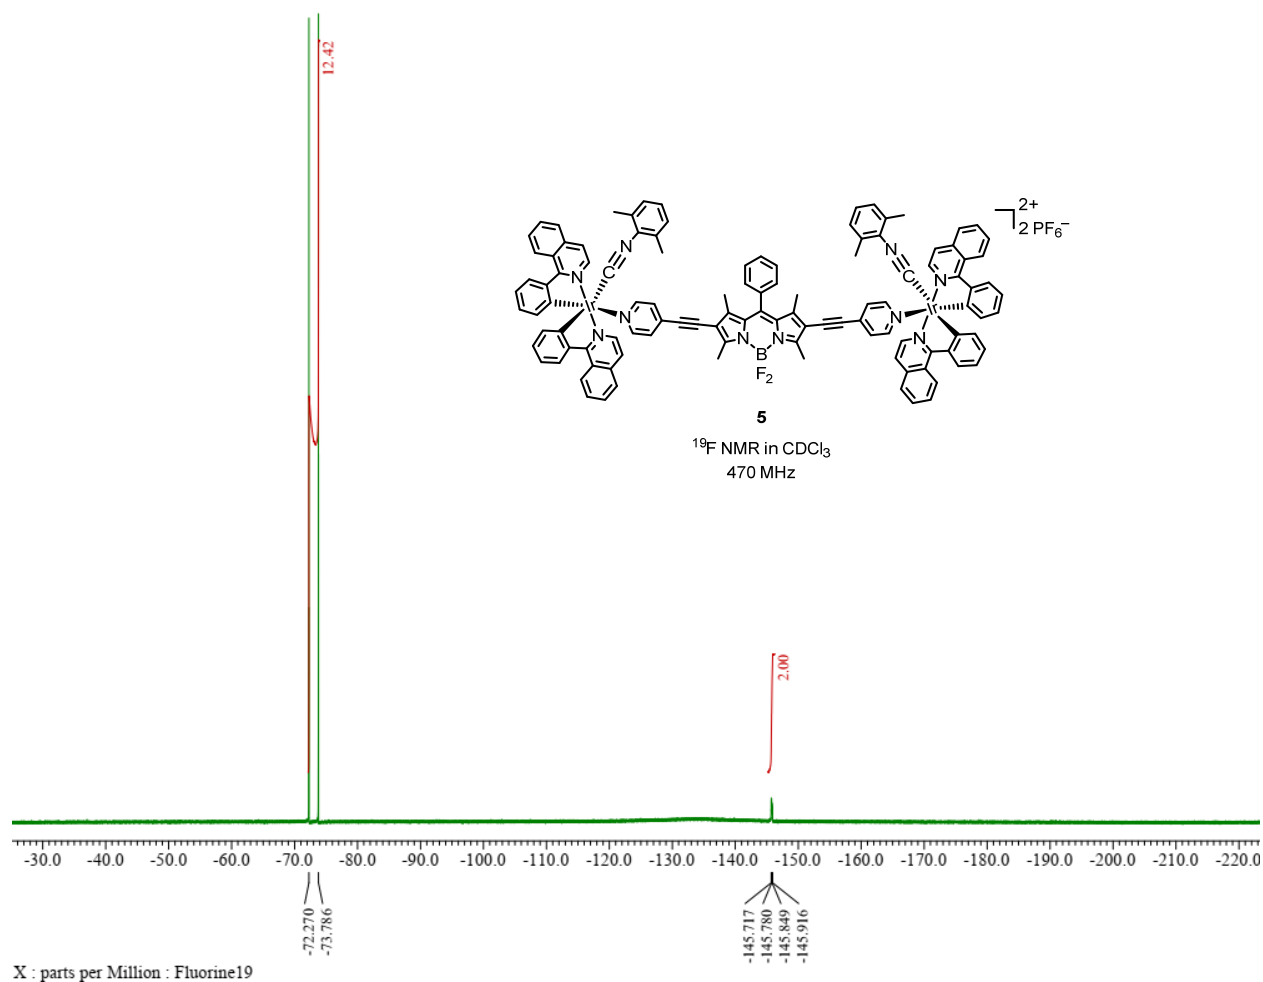

**Fig. S8.**  $^{19}\text{F}$  NMR spectrum of complex **5**, recorded at 470 MHz in  $\text{CDCl}_3$ .

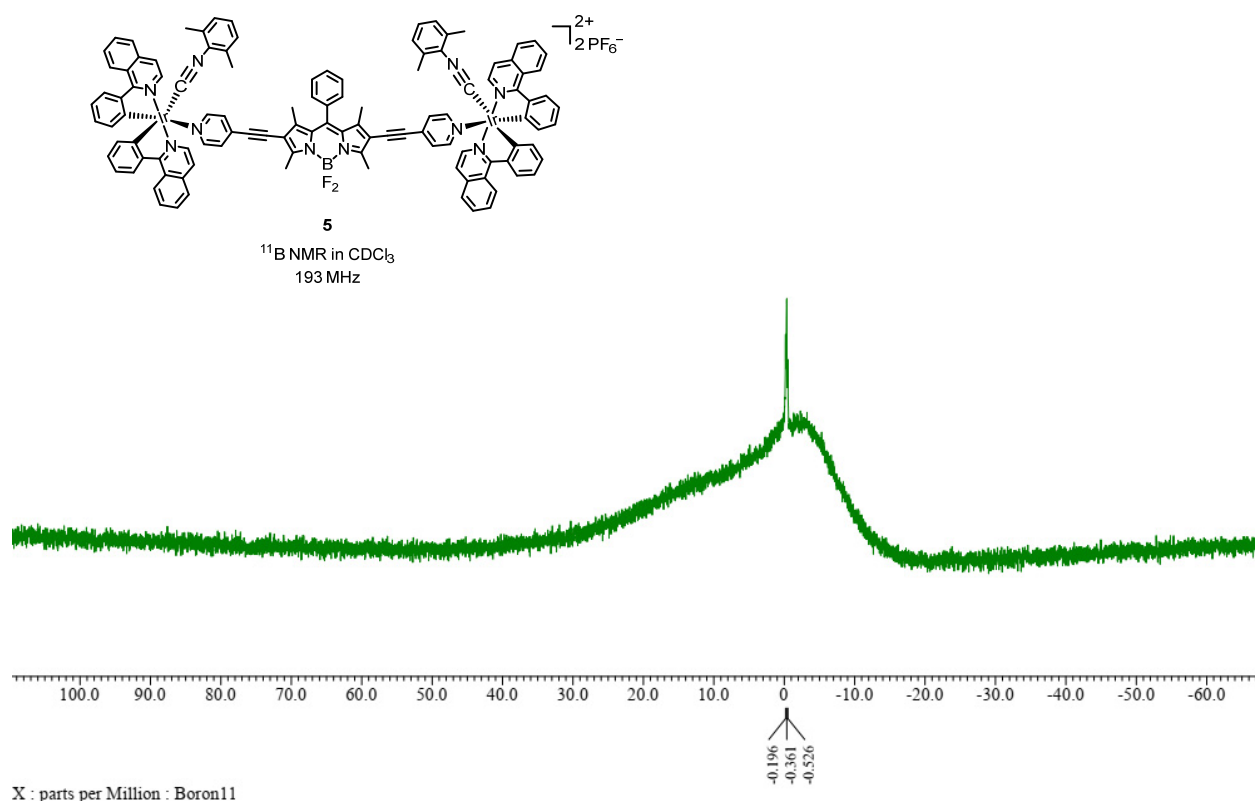

**Fig. S9.** <sup>11</sup>B NMR spectrum of complex **5**, recorded at 193 MHz in CDCl<sub>3</sub>.

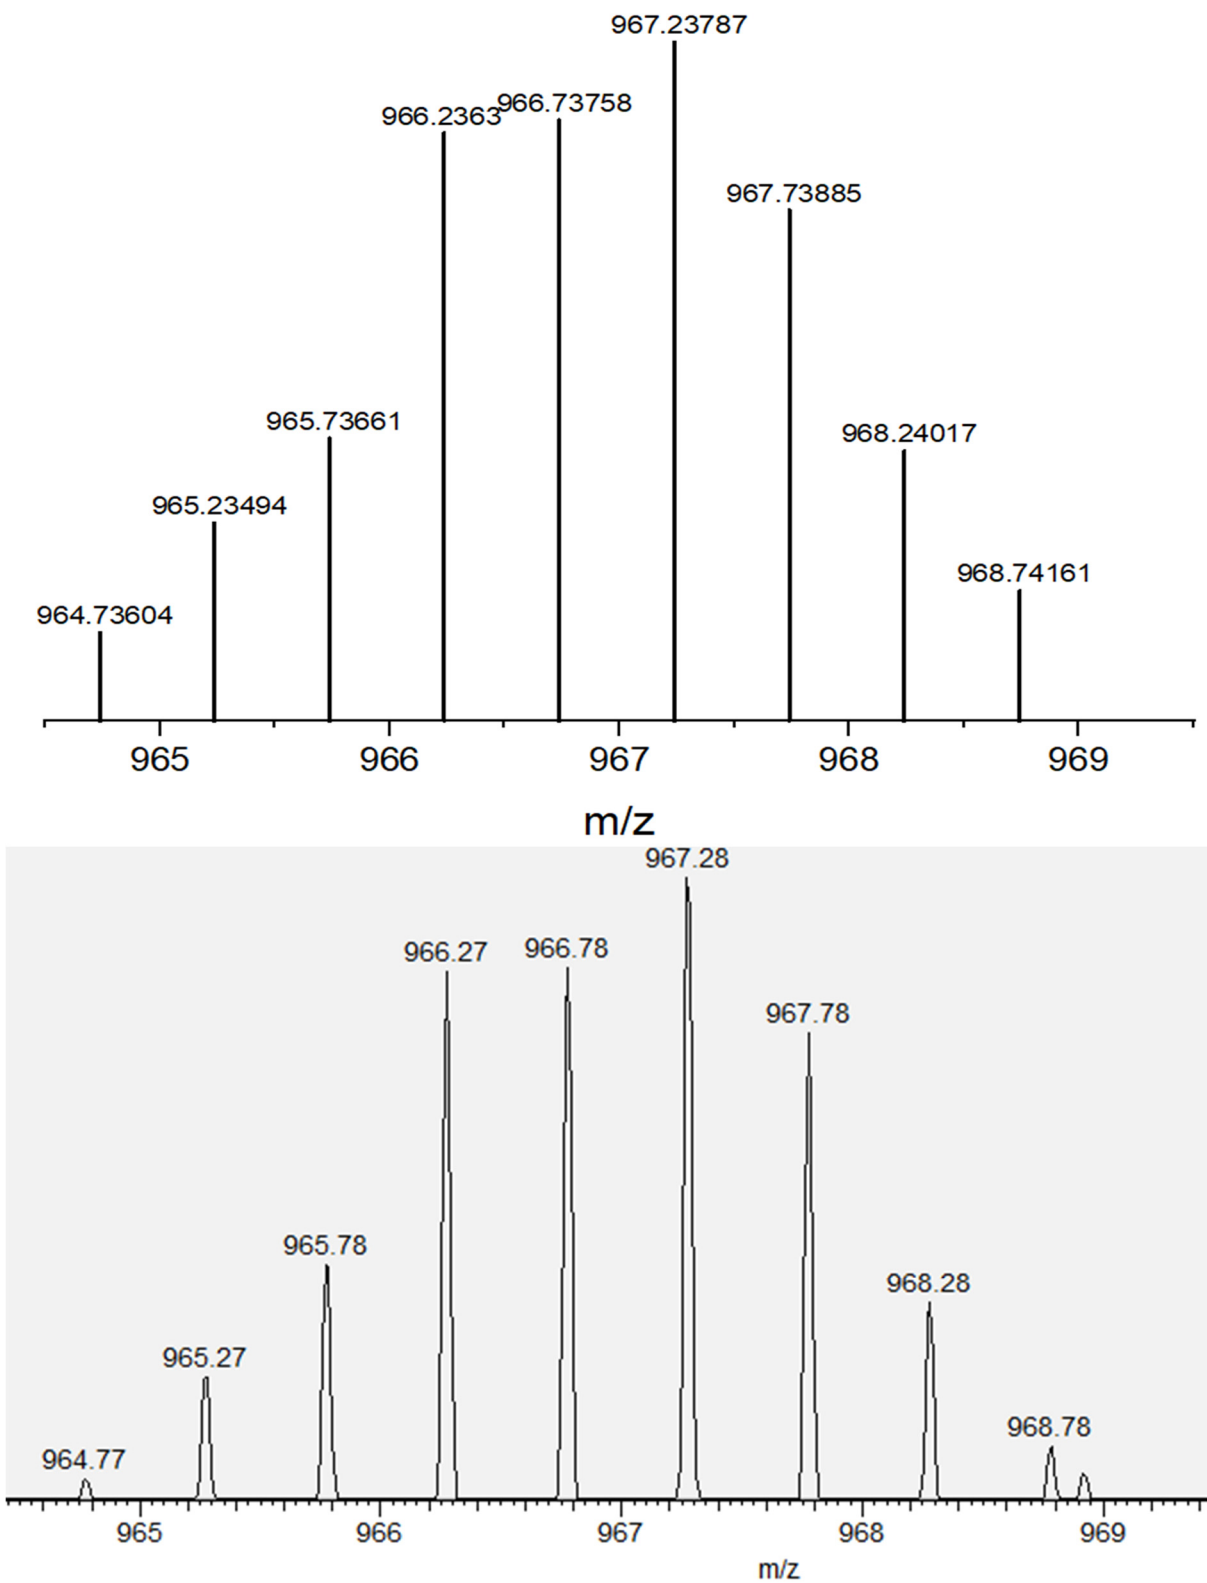

**Fig. S10.** Simulated (top) and experimental (bottom) ESI-MS data for complex **3**, showing the isotropic distribution pattern for the molecular ion peak ( $[M - PF_6]^{2+}$ ).

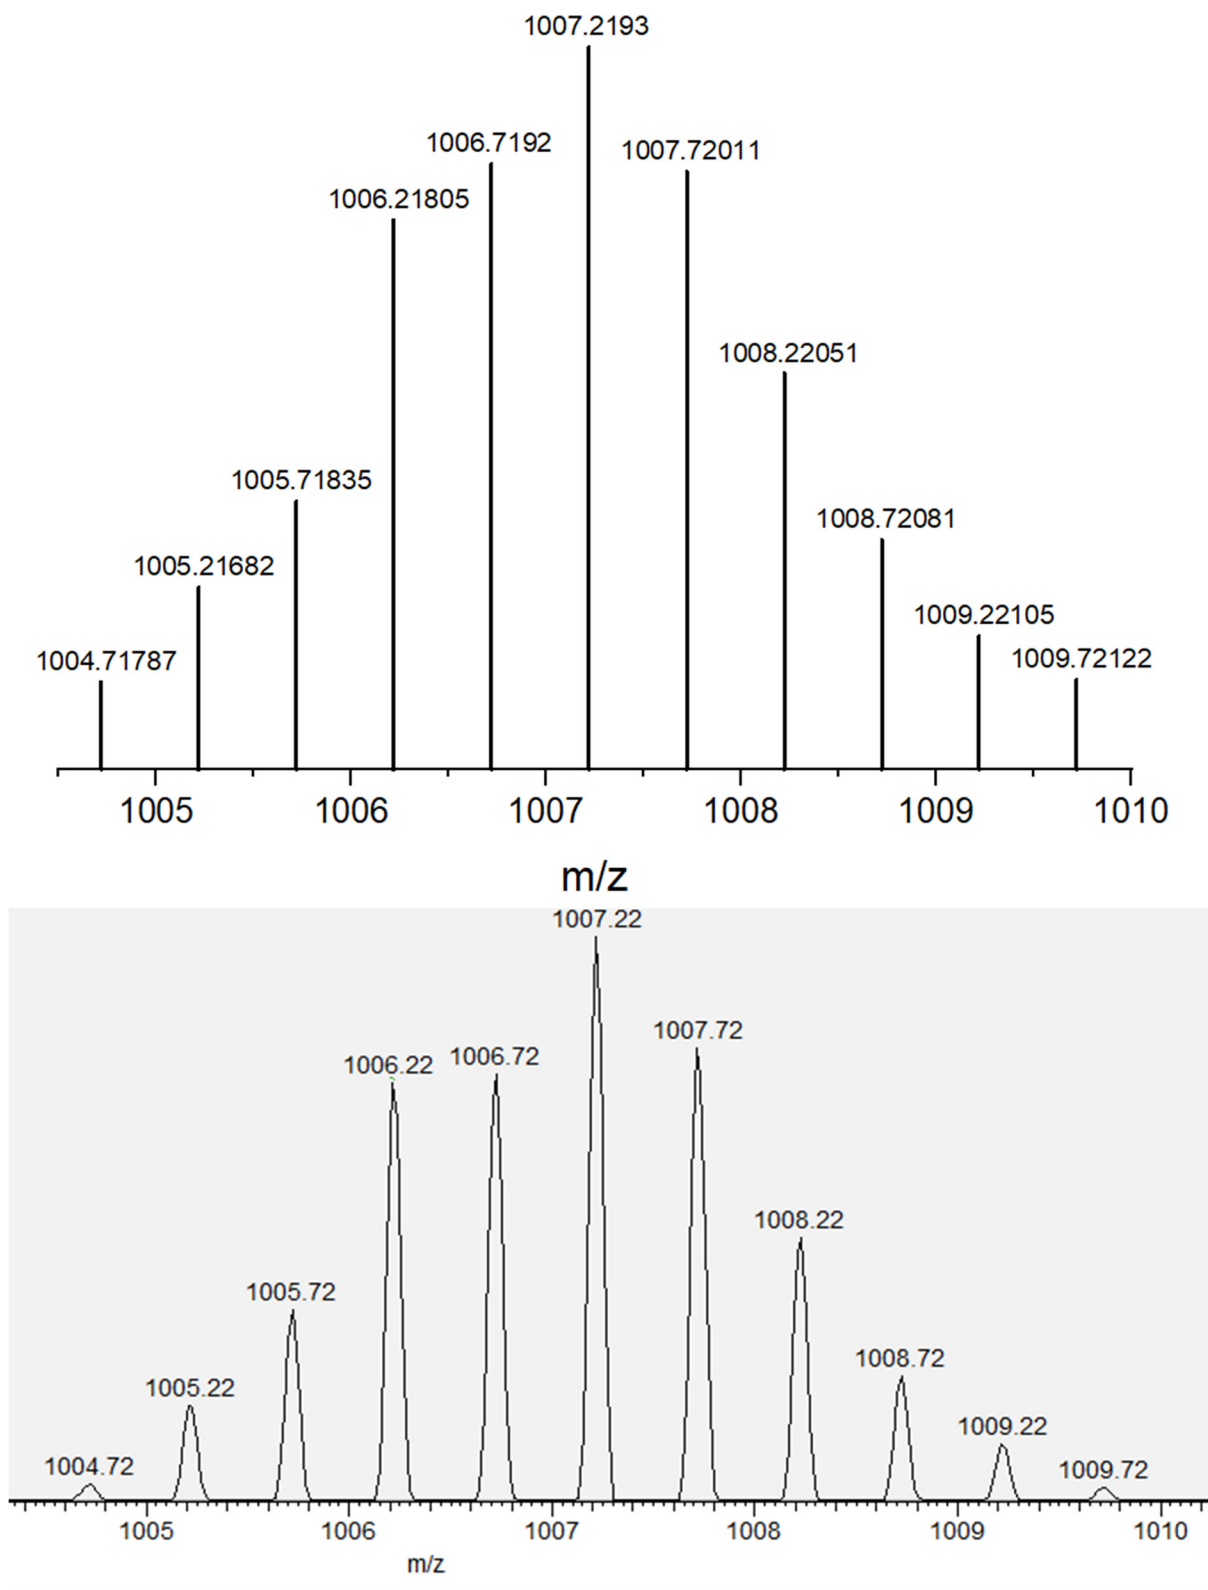

**Fig. S11.** Simulated (top) and experimental (bottom) ESI-MS data for complex 4, showing the isotropic distribution pattern for the molecular ion peak ( $[M - PF_6]^{2+}$ ).

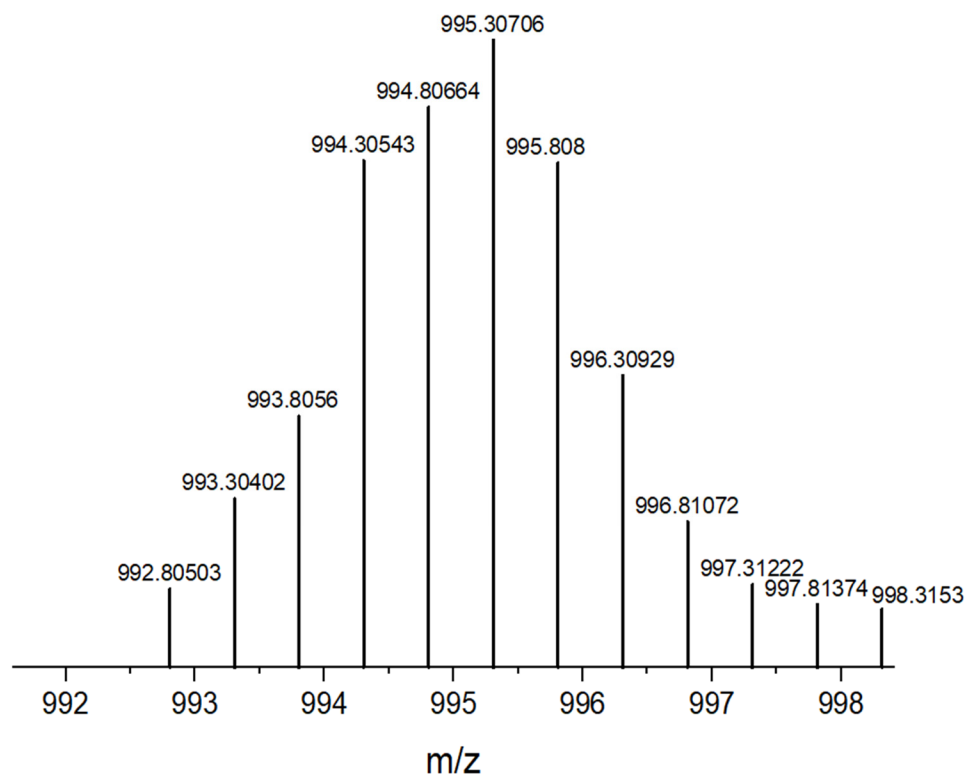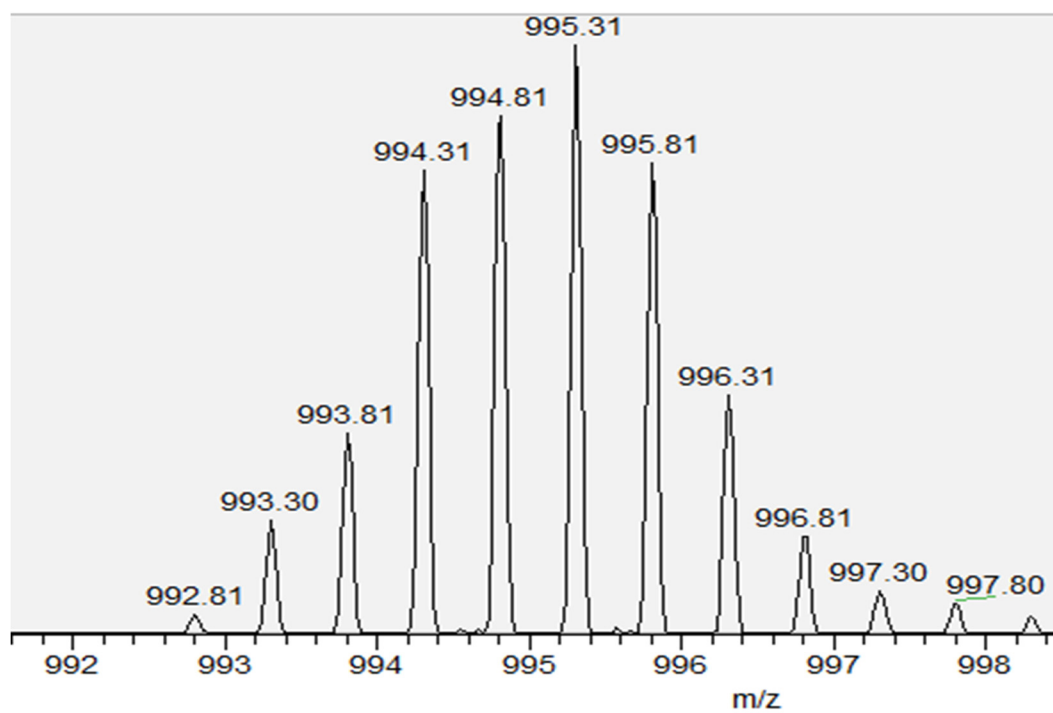

**Fig. S12.** Simulated (top) and experimental (bottom) ESI-MS data for complex **5**, showing the isotropic distribution pattern for the molecular ion peak ( $[M - PF_6]^{2+}$ ).

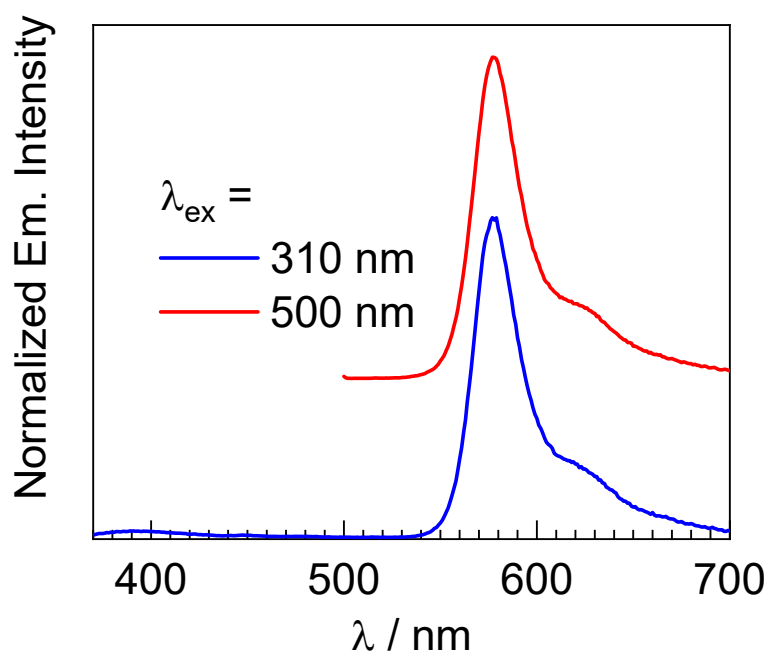

**Fig. S13.** Overlaid photoluminescence spectra of complex **3** with 310 nm and 500 nm excitation. Spectra were recorded in  $\text{CH}_2\text{Cl}_2$  at room temperature.

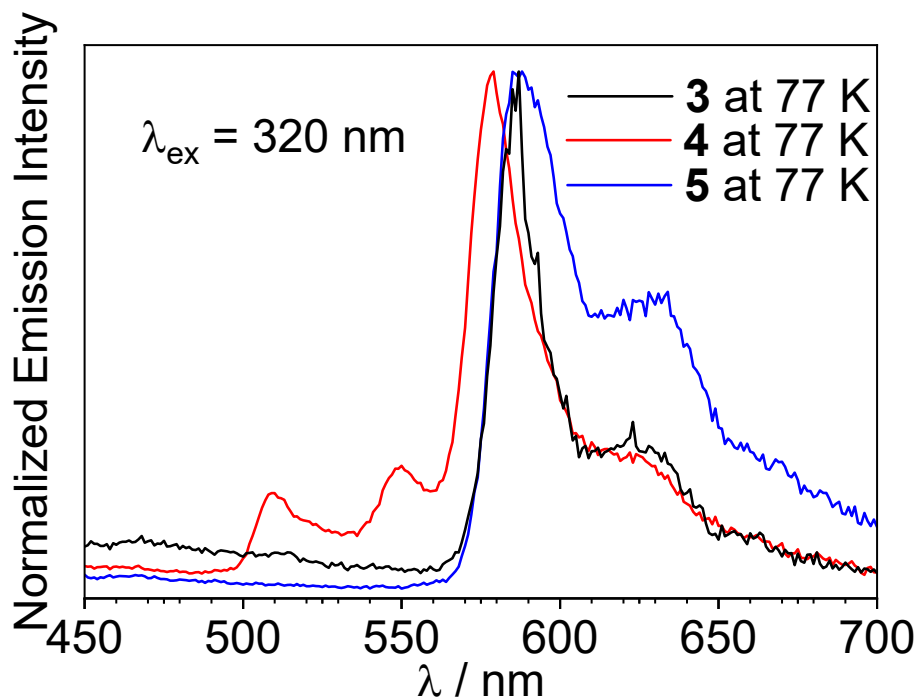

**Fig. S14.** Overlaid emission spectra of complexes **3** – **5** at 77 K. Spectra were excited at 320 nm and recorded in a 1 : 3 mixture of  $\text{CH}_2\text{Cl}_2$  : toluene.

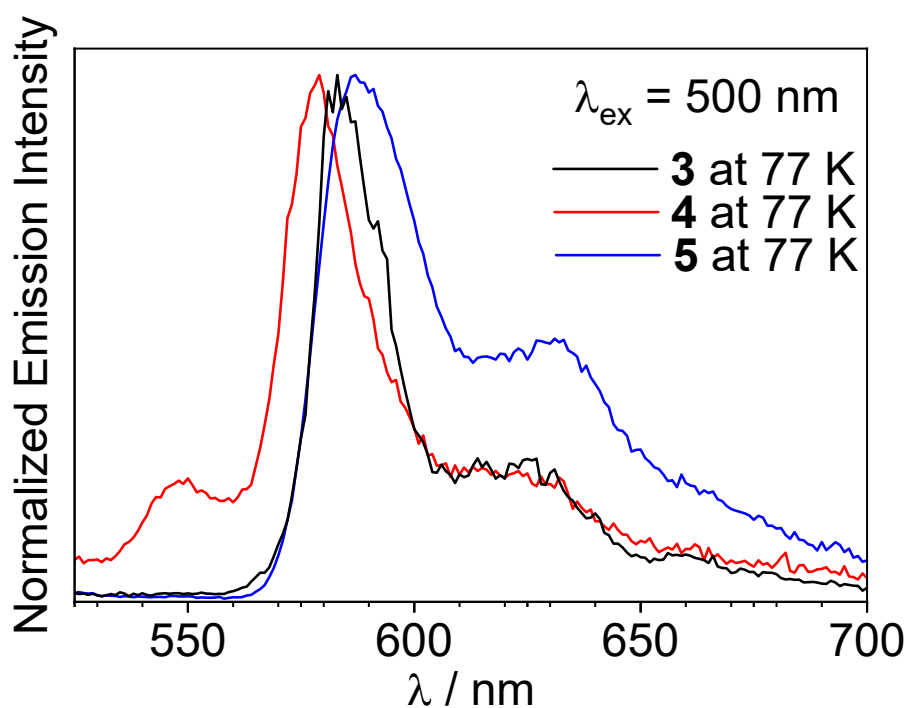

**Fig. S15.** Overlaid emission spectra of complexes **3** – **5** at 77 K. Spectra were excited at 500 nm and recorded in a 1 : 3 mixture of  $\text{CH}_2\text{Cl}_2$  : toluene.

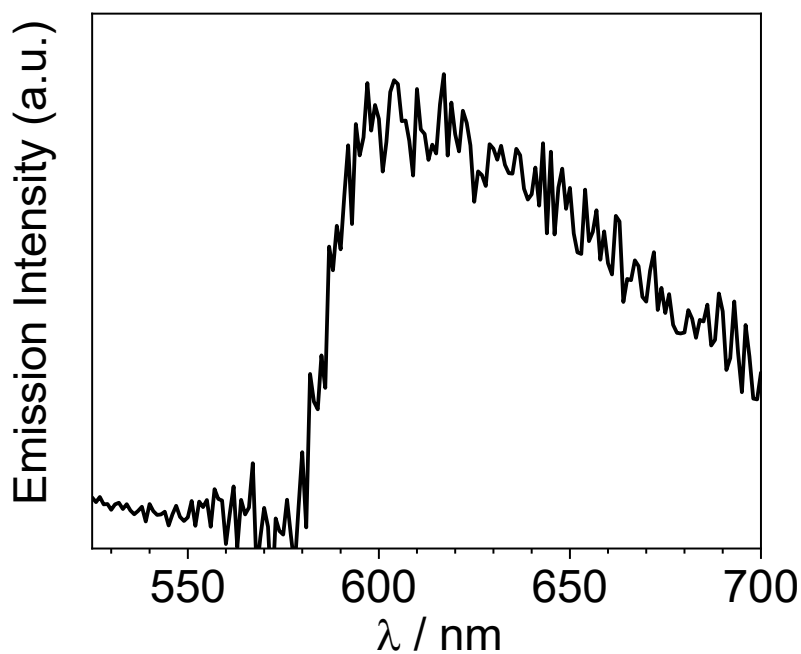

**Fig. S16.** Difference spectrum of complex **5**, determined by subtracting the PL spectrum obtained with 500 nm excitation from the spectrum obtained with 310 nm excitation..

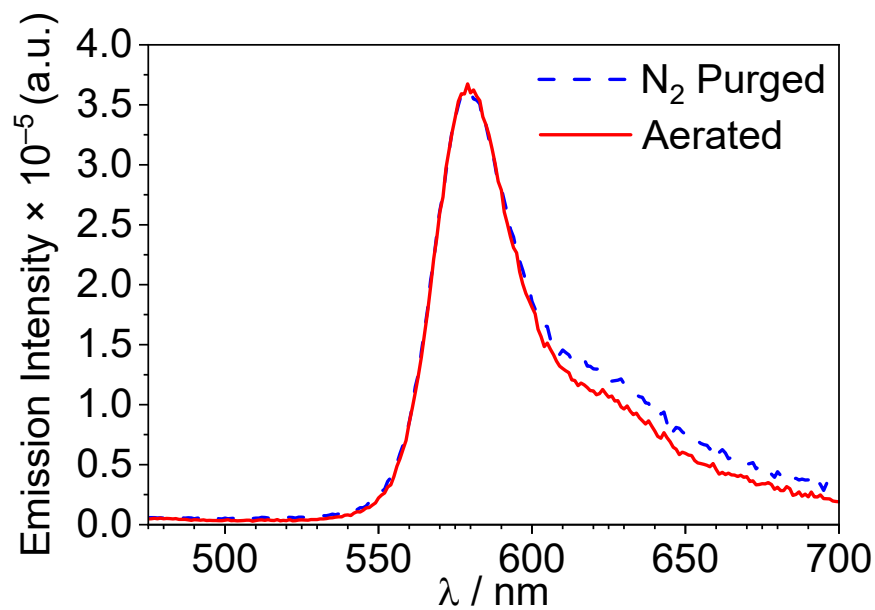

**Fig. S17.** Emission spectra of complex **5** measured at room temperature in CH<sub>2</sub>Cl<sub>2</sub> under N<sub>2</sub>-purged and aerated conditions ( $\lambda_{\text{ex}} = 310$  nm).

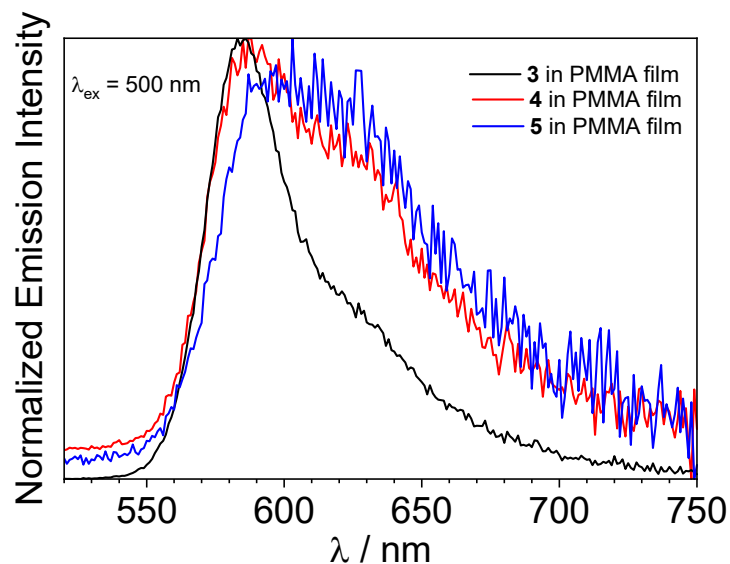

**Fig. S18.** Overlaid emission spectra of complexes **3** – **5** in PMMA films, doped at 2.5 wt%. Spectra were excited at 500 nm.

**Table S1.** Summary of emission data ( $\lambda_{\text{ex}} = 500$  nm) for Ir-BODIPY constructs **3** – **5** in PMMA films.

|          | $\lambda_{\text{em}}/\text{nm}$ | $\Phi_{\text{PL}}^a$ | $\tau/\text{ns}^b$ |
|----------|---------------------------------|----------------------|--------------------|
| <b>3</b> | 583                             | 0.87                 | 2.8                |
| <b>4</b> | 588                             | 0.44                 | 4.8                |
| <b>5</b> | 603                             | 0.059                | 13                 |

<sup>a</sup> Excited at 400 nm. <sup>b</sup> Excited at 455 nm.

**Table S2.** Summary of emission data ( $\lambda_{\text{ex}} = 564$  nm) for Ir-BODIPY constructs **3**–**5** in  $\text{CH}_2\text{Cl}_2$  solution, along with radiative and nonradiative rate constants.

|          | $\lambda_{\text{em}}/\text{nm}$ | $\Phi_{\text{PL}}$ | $\tau/\text{ns}$ | $k_{\text{r}} \times 10^{-8}/\text{s}^{-1}$ | $k_{\text{nr}} \times 10^{-8}/\text{s}^{-1}$ |
|----------|---------------------------------|--------------------|------------------|---------------------------------------------|----------------------------------------------|
| <b>2</b> | 580                             | 0.53               | 3.7              | 1.4                                         | 1.3                                          |
| <b>3</b> | 577                             | 0.58               | 3.4              | 1.7                                         | 1.2                                          |
| <b>4</b> | 579                             | 0.87               | 2.6              | 3.3                                         | 0.50                                         |
| <b>5</b> | 578                             | 0.18               | 2.0              | 0.90                                        | 4.1                                          |

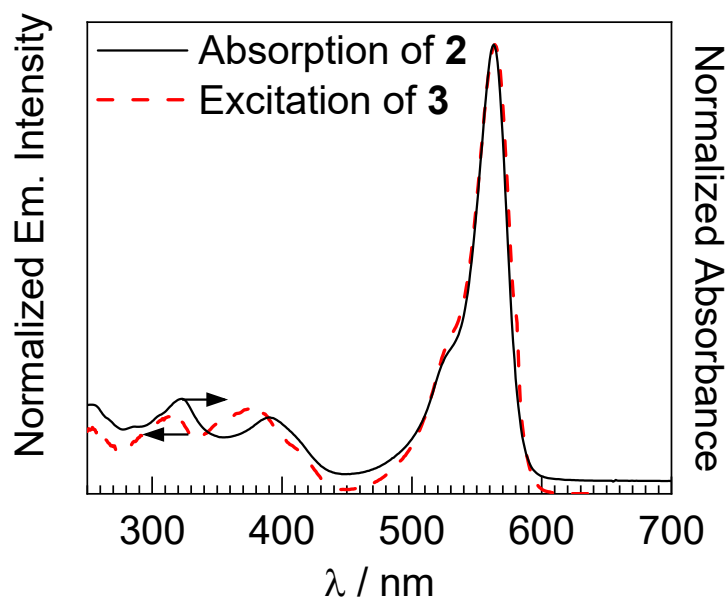

**Fig. S19.** Overlaid UV-vis absorption spectrum of BODIPY **2** (black solid line) and photoluminescence excitation spectrum of complex **3** (red dashed line). Spectra were recorded in  $\text{CH}_2\text{Cl}_2$  at room temperature, and for the excitation spectrum  $\lambda_{\text{em}} = 564$  nm.

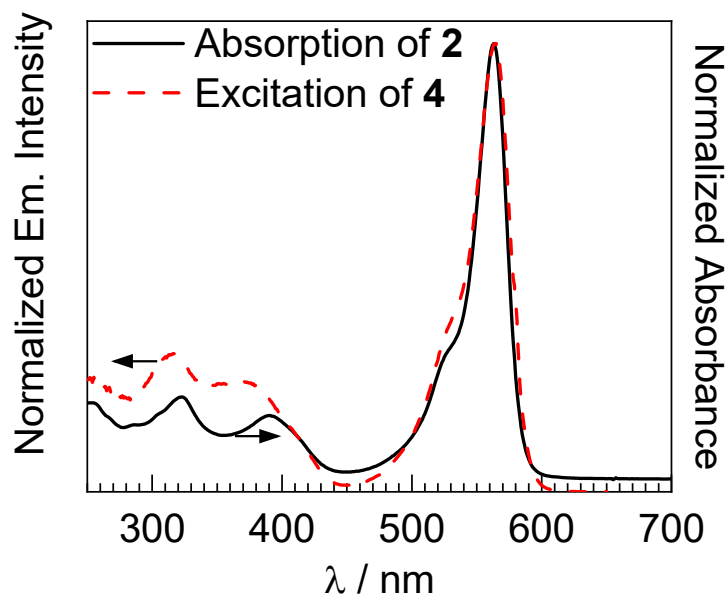

**Fig. S20.** Overlaid UV-vis absorption spectrum of BODIPY **2** (black solid line) and photoluminescence excitation spectrum of complex **4** (red dashed line). Spectra were recorded in  $\text{CH}_2\text{Cl}_2$  at room temperature, and for the excitation spectrum  $\lambda_{\text{em}} = 564$  nm.

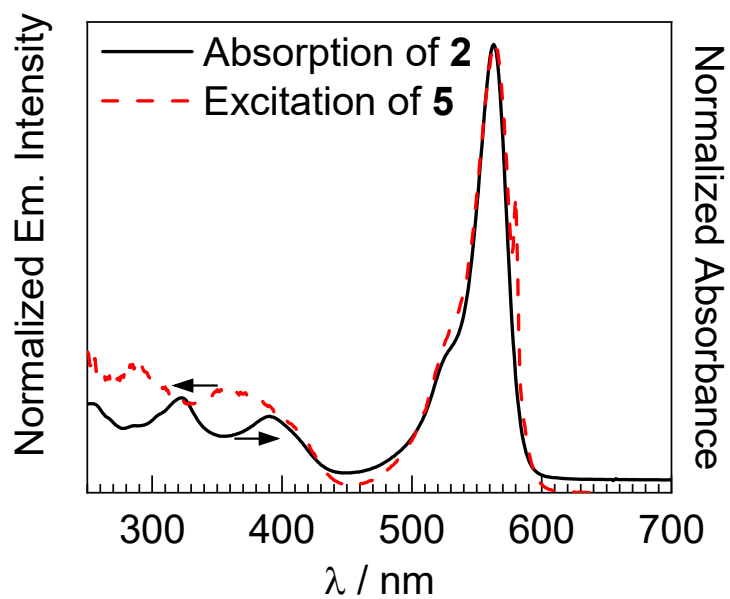

**Fig. S21.** Overlaid UV-vis absorption spectrum of BODIPY **2** (black solid line) and photoluminescence excitation spectrum of complex **5** (red dashed line). Spectra were recorded in  $\text{CH}_2\text{Cl}_2$  at room temperature, and for the excitation spectrum  $\lambda_{\text{em}} = 564$  nm.
